# Supplementary material for: Bruceine a exerts antitumor effect against colon cancer by accumulating ROS and suppressing PI3K/Akt pathway
Source: PubMed Central journal article supplement (PMC10086190; doi:10.3389/fphar.2023.1149478), 2023-03-28
Supplement: DataSheet1.pdf [file DataSheet1.pdf]

# Bruceine A exerts antitumor effect against colon cancer by accumulating ROS and suppressing PI3K/Akt pathway

Chaozheng Zhang<sup>1, (†)</sup>, Yuening Cao<sup>1, (†)</sup>, Yi Zuo<sup>1, (†)</sup>, Hongbin Cheng<sup>1, 4</sup>, Changqun Liu, Bo Ren<sup>1</sup>, Yun Deng<sup>1</sup>, Maolin Wang<sup>2, 3, \*</sup>, Jun Lu<sup>1, \*</sup>

1. State Key Laboratory of Southwestern Chinese Medicine Resources, School of Pharmacy, Chengdu University of Traditional Chinese Medicine, Chengdu, China;

2. Clinical Research Center, The First Affiliated Hospital of Shantou University Medical College, Shantou, Guangdong Province, China;

3. Department of Physiology, School of Basic Medical Sciences, Shenzhen University, China;

4. Hospital of Chengdu University of Traditional Chinese Medicine, Chengdu, China;

\* **Correspondence:** Jun Lu, [ljaaa111@163.com](mailto:ljaaa111@163.com); Maolin Wang, [wangml1240@163.com](mailto:wangml1240@163.com).

(†) These authors contributed equally to this work and share first authorship.

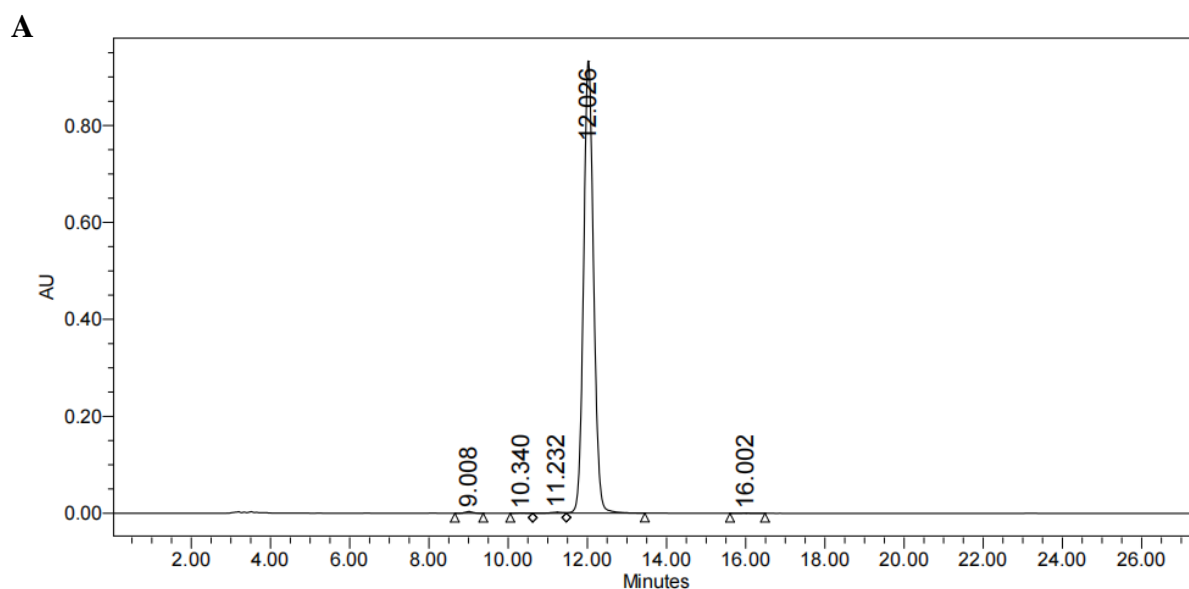

|   | RT     | Area     | % Area | Height |
|---|--------|----------|--------|--------|
| 1 | 9.008  | 46813    | 0.28   | 3448   |
| 2 | 10.340 | 11434    | 0.07   | 698    |
| 3 | 11.232 | 44928    | 0.27   | 1918   |
| 4 | 12.026 | 16350449 | 99.32  | 934296 |
| 5 | 16.002 | 8704     | 0.05   | 393    |

**B**

## Display Report

### Analysis Info

Analysis Name D:\Data\MCW-Data\HPLC-MS-Data\20230302\BA\_21\_1\_6888.d  
Method HPLC - MS - positive.m  
Sample Name BA  
Comment

Acquisition Date 3/2/2023 10:05:54 AM

Operator Demo User

Instrument timsTOF 1844426.00130

### Acquisition Parameter

|             |            |                       |           |                  |           |
|-------------|------------|-----------------------|-----------|------------------|-----------|
| Source Type | ESI        | Ion Polarity          | Positive  | Set Nebulizer    | 2.0 Bar   |
| Focus       | Not active | Set Capillary         | 4500 V    | Set Dry Heater   | 220 °C    |
| Scan Begin  | 50 m/z     | Set End Plate Offset  | -500 V    | Set Dry Gas      | 8.0 l/min |
| Scan End    | 1300 m/z   | Set Collision Cell RF | 400.0 Vpp | Set Divert Valve | Waste     |

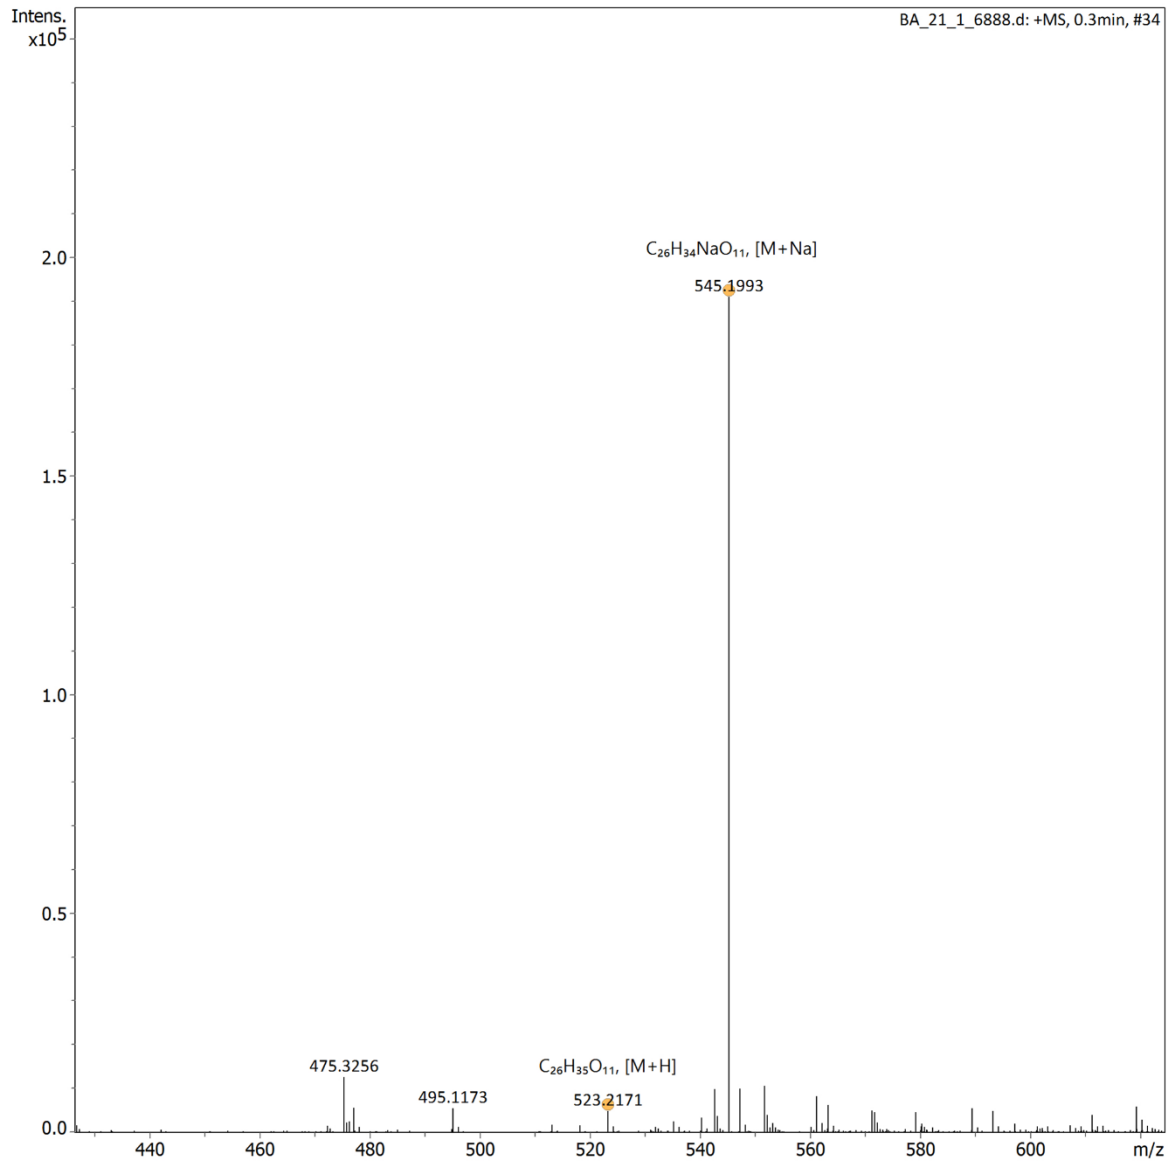

**SI Figure 1** HPLC (A) and HRMS (B) spectra of BA.

**A**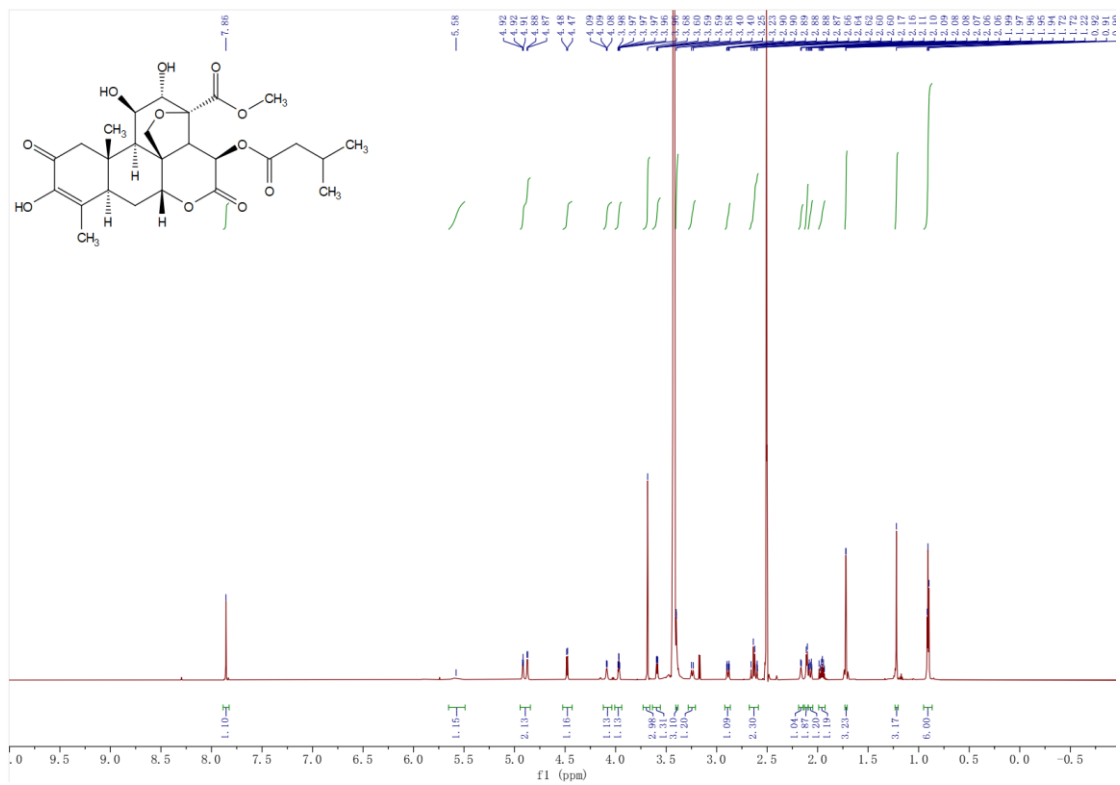**B**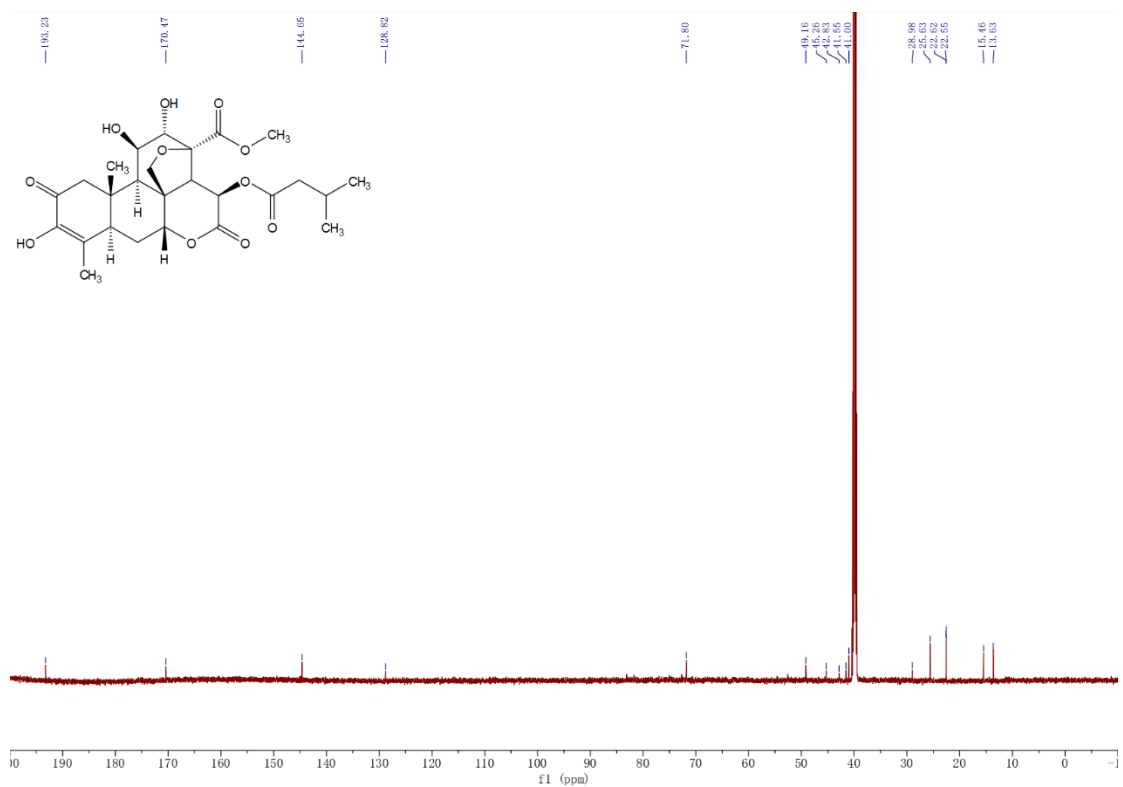

**SI Figure 2**  $^1\text{H}$ -NMR and  $^{13}\text{C}$ -NMR spectra of Bruceine A. (A)  $^1\text{H}$  NMR (700 MHz, DMSO-*d*<sub>6</sub>)  $\delta$  7.86 (s, 1H, 3-OH), 5.58 (s, 1H, H-15), 4.95 – 4.84 (m, 2H, H-7, H-20a), 4.48 (d,  $J = 7.3$  Hz, 1H, H-11), 4.12 – 4.04 (m, 1H, H-20b), 3.97 (td,  $J = 4.9, 1.6$  Hz, 1H, H-12), 3.68 (s, 3H, 22-OMe), 3.59 (dd,  $J = 7.4, 1.7$  Hz, 1H, 11-OH), 3.40 (m, 2H, H-9, H-14, ), 3.24 (d,  $J = 13.0$  Hz, 1H, H-1b), 2.89 (dt,  $J = 13.2, 2.3$  Hz, 1H, H-1a), 2.68 – 2.59 (m, 2H, H-5, H-2'b), 2.16 (d,  $J = 4.9$  Hz, 1H, 12-OH), 2.11 (d,  $J = 7.3$  Hz, 2H, H-2'a, H-3'), 2.07 (dt,  $J = 14.8, 3.0$  Hz, 1H, H-6b), 1.99 – 1.93 (m, 1H, H-6a), 1.72 (d,  $J = 1.9$  Hz, 3H, 18-Me), 1.22 (s, 3H, 19-Me), 0.91 (t,  $J = 6.1$  Hz, 6H, 4'/5'-Me). (B)  $^{13}\text{C}$  NMR (176 MHz, DMSO-*d*<sub>6</sub>)  $\delta$  193.23 (C-2), 170.47 (C-16, C-21, C-1'), 144.65 (C-3), 128.82(C-4), 82.90(C-7), 80.76(C-13), 71.8(C-11, C-20), 49.16(C-22, C-14), 45.26(C-9), 42.83(C-2'), 41.55(C-5), 41.00(C-10), 28.98(C-6), 25.63(C-3'), 22.62(C-5'), 22.55(C-4'), 15.46(C-19), 13.63(C-18). Based on the above data, The compound was identified as bruceine A, which was consistent with the reported literature values.
